# Supplementary material for: Durability Improvement of Cement Using Amphiphilic Calcium Carbonate Nanoparticles
Source: MDPI journal article supplement (doi:10.3390/coatings12101431), 2022-09-29
Supplement: s1 [file s1]

Archive with 1 entries (1 files):
- coatings-1844580-supplementary.pdf
