# Supplementary material for: Durability Improvement of Cement Using Amphiphilic Calcium Carbonate Nanoparticles
Source: MDPI journal article supplement (doi:10.3390/coatings12101431), 2022-09-29
Supplement: s1 [file s1 › coatings-1844580-supplementary.pdf]

**Text S1: Preparation of the dispersant.**

The dispersant was prepared via free-radical co-polymerization. In the preparation, 50.8 g of lauric methacrylate (A.R.), 50.0 g of methyl polyethylene glycol methacrylate (95%,  $M_w = 500$ ) and 1.73 g of 1-dodecanethiol were mixed. The resultant solution was added simultaneously with 50 mL of ethyl acetate solution containing 1%( $w/v$ ) AIBN to 150 mL of ethyl acetate at 338 K and nitrogen protection. The addition of both solutions was performed in 120 min at an even flow by two peristaltic pumps. After addition, the reactor was kept at 338 K under  $N_2$  flow for another 30 min. Finally, the resultant polymer solution was desolventized on a rotary evaporator. The resultant dispersant, a sticky liquid, was kept for further use.
